# Supplementary material for: Virus-Mediated Transient Expression Techniques Enable Functional Genomics Studies and Modulations of Betalain Biosynthesis and Plant Height in Quinoa
Source: PubMed Central journal article supplement (PMC8014037; doi:10.3389/fpls.2021.643499), 2021-03-18
Supplement: Data_Sheet_1.pdf [file Data_Sheet_1.pdf]

```

*****
CqPDS1A 1 ATGAGTCATCTGGATATAGTTTGGCTACACAATCCACATCAAAATATGCTCTTTGGGAAATTTGAGTAACCCCACTTCAGTTTCATCTGGGTAGTAGT 100
CqPDS1B 1 ATGAGTCATCTGGATATAGTTTGGCTACCCAATCCACATCAAAATATGTTCTTTTGGGAAATTTGAGTAACCCCACTTCAGTTTCATCTGGGTAGTAGT 100

*****
CqPDS1A 101 AATTTATGGGTAATCTCTGAAGAAATTCAGTTTATAGCAAGAAATTTGGCAAAAAGCAAGAAATGGGTAATCCCATTAAGAGTTGTTTGTGTAGATTA 200
CqPDS1B 101 AATTTCTGGCAATCTCTGAAGAAATTCAGTTTATAGCAAGAAATTTGGCAAAAAGCAAGAAATAGGGTATTTCCCATTAAGAGTTGTTTGTGTAGATTA 200

*****
CqPDS1A 201 TCCAAGGCCAGAGCTTGATAATACAGCG--AATTTCTTGAAGCTGCTTAATGCTTTCGACTTTTCGGAATTCGCCCGTCCGAAGAAGCCATTAGAAG 298
CqPDS1B 201 TCCAAGGCCAGAAATGATAATACAG--TCAATTTCTTGAAGCTGCTTATTTGCTTCGACTTTTCGGAATTCACCCCGTCCGAAGAAGCCATTAGAAG 298

*****
CqPDS1A 299 TTGTAATGGCCGTCGCGTTTGGCTGGTCTATCCACGGCAAAGTATTAGCAGATGCAGGTACAAAACCATATATGCTGGAAGCACGAGATGTTTGGG 398
CqPDS1B 299 TTGTAATGGCTGGTCCGGTTTGGCTGGTCTATCTACAGCAAAGTATTAGCAGATGCAGGTACAAAACCATATATGCTGGAAGCACGAGATGTTTGGG 398

*****
CqPDS1A 399 TGGGAAGATAGCGCATGGAAGACAGGATGGGGACTGGTATGAACAGGGCTACATATATTTCTTTGGGGCTTATCCAAATGTACAGAATCTGTTTGGGA 498
CqPDS1B 399 TGGGAAGATAGCAGCATGGAAGACAGGATGGGGACTGGTATGAGACAGGGCTACATATATTTCTTTGGGGCTTATCCAAATGTACAGAATCTGTTTGGGA 498

*****
CqPDS1A 499 GAGCTAGGTATTAAAGCCGATACAAATGGAAGGAGCACTCAATGATTTTGGCAATGCTTAGCAAGCTGGTGAATTTAGCCGCTTTGATTTGAAGAA 598
CqPDS1B 499 GAGCTCGTATTAAAGCCGATACAAATGGAAGGAGCACTCAATGATTTTGGCAATGCTTAGCAAGCTGGTGAATTTAGCCGCTTTGATTTGAAGAA 598

**
CqPDS1A 599 TCTTGGCTGCACCATTAATGGCATATGGGCAATCTTAAGGAATAATGAAATGCTTACCTGGCCAGAGAAAATCAAGTTGCTATTTGCTCTCTGGCTGC 698
CqPDS1B 599 TCTTGGCTGCACCATTAATGGCATATGGGCAATCTTAAGGAATAATGAAATGCTTACCTGGCCAGAGAAAATCAAGTTGCTATTTGCTCTCTGGCTGC 698

*****
CqPDS1A 699 AATGGTTGGTGGCAATCGTATGTTGAGGCACAAGATGGTTGAGTGTCCAAGATGGATGAGGAAGCAAGGTGACCTGATCGTGAACGATGATGAAGTA 798
CqPDS1B 699 AATGGTTGGTGGCAATCGTATGTTGAGGCACAAGATGGTTGAGTGTCCAAGATGGATGAGGAAGCAAGGTGACCTGATCGTGAACGATGATGAAGTA 798

*****
CqPDS1A 799 TTTATGGCATTGCAAGGCAATGAACTTCATAAATCCTGATGAACCTTCGATGCAGTGTATCTGATGCTCTGAACCCGATTTTGCAGGAGAAGCATG 898
CqPDS1B 799 TTTATGGCATTGCAAGGCAATGAACTTCATAAATCCTGATGAACCTTCGATGCAGTGTATCTGATGCTCTGAACCCGATTTTGCAGGAGAAGCATG 898

*****
CqPDS1A 899 GTTCCAAAATGGCTTTCTCGGATGGCAATCCTCCGAAAGCTGTGCATGCCATTGTTGAGCATATAGAGTCACTTGGCGGTGAAGTGGCACTCAATTC 998
CqPDS1B 899 GTTCCAAAATGGCTTTCTCGGATGGCAATCCTCCGAAAGCTGTGCATGCCATTGTTGAGCATATAGAGTCACTTGGCGGTGAAGTGGCACTCAATTC 998

*****
CqPDS1A 999 TCGTCTTCAGAAATAAAGTTAGCTCAGGATGGAACCTGTAGATAGTTTGTCTAACTAAATGGAAGAGGTTAGAGGAGATGCTTATGCTCTGCTGCT 1098
CqPDS1B 999 TCGTCTTCAGAAATAAAGTTAGCTCAGGATGGAACCTGTAGATAGTTTGTCTAACTAAATGGAAGAGGTTAGAGGAGATGCTTATGATCTGCTGCT 1098

*****
CqPDS1A 1099 CCAGTCGACATCCTGAAGCTGCTTCTACCTGATGAATGGAAGAAATATCGTACTTCAAAAAGTTGGATAAACTAGTAGGAGTCCAGTCAATTAATGFTC 1198
CqPDS1B 1099 CCAGTCGACATCCTGAAGCTGCTTCTACCTGATGAATGGAAGAAATATCGTACTTCAAAAAGTTGGATAAACTAGTAGGAGTCCAGTCAATTAATGFTC 1198

*****
CqPDS1A 1199 ACATATGGTTTGACAGAAAATGGAAGATAACATACGACCATCTACTATTTAGCAGGAGTAATATTTGAGTGTCTATGCTGATATGTCATGACATGCCAA 1298
CqPDS1B 1199 ACATATGGTTTGATAGAAAATGGAAGATAACATACGACCATCTACTATTTAGCAGGAGTAATATTTGAGTGTCTATGCTGATATGTCATGACATGCCAA 1298

*****
CqPDS1A 1299 GGAATACATGATCCAAATAAATCTATGTTGGAATTTGGTATTTGCACCAGCAGAAGATGGATTGCTCGCAGTGCACCTGATATAATGAGGCAACAATG 1398
CqPDS1B 1299 GGAATATGATGATCCAAATAAATCTATGTTGGAATTTGGTATTTGCACCAGCAGAAGATGGATTGCTCGCAGTGCACCTGATATAATGAGGCAACAATG 1398

*****
CqPDS1A 1399 AAAGAACTGCCAAACTTTTCCCTGACGAAATTCAGCTGATGGGAGCAAGGCTAAGATCCTCAAATATCATGCTGCAAGACTCCAAGGCTGTTTATA 1498
CqPDS1B 1399 AAAGAACTGCCAAACTTTTCCCTGACGAAATTCAGCTGATGGGAGCAAGGCTAAGATCCTCAAATATCATGCTGCAAGACTCCAAGGCTGTTTATA 1498

*****
CqPDS1A 1499 AGACAGTTTCAAATTTGGAACCTTTGTCGCCGCTGCAAAGATCACCTATGAGGGTTTTTATTATCTGGTGTATTCACGAAACAAAATATTGGCTTC 1598
CqPDS1B 1499 AGACAGTTTCAAATTTGGAACCTTTGTCGCCGCTGCAAAGATCACCTATGAGGGTTTTTATTATCTGGTGTATTTACGAAACAAAATATTGGCTTC 1598

*****
CqPDS1A 1599 AATGGAAGGAGCTGTTTATCTGGGAAGTTTGTGCACAGGCTATTGTGCAGGATTACAGTTGCTGCTGCTCGAGCACAAGAGAATGGCCGGAGCT 1698
CqPDS1B 1599 AATGGAAGGAGCTGTTTATCTGGGAAGTTTGTGCACAGGCTATTGTGCAGGATTACAGTTGCTGCTGCTCGAGCACAAGAGAATGGCCGGAGCT 1698

*****
CqPDS1A 1699 GGCAATGTATGA 1710
CqPDS1B 1699 GGCAATGTATAA 1710

```

**Figure S1** Alignment of nucleotide sequences of *CqPDS1* homoeolog genes, *CqPDS1A* and *CqPDS1B*. Asterisks indicate conserved bases between the two homoeolog genes. Two 300-bp VIGS trigger sequences inserted into ALSV-CqPDSN and ALSV-CqPDSC vectors are highlighted in magenta and turquoise, respectively. The primer positions designed for RT-qPCR analysis are indicated with blue arrows.

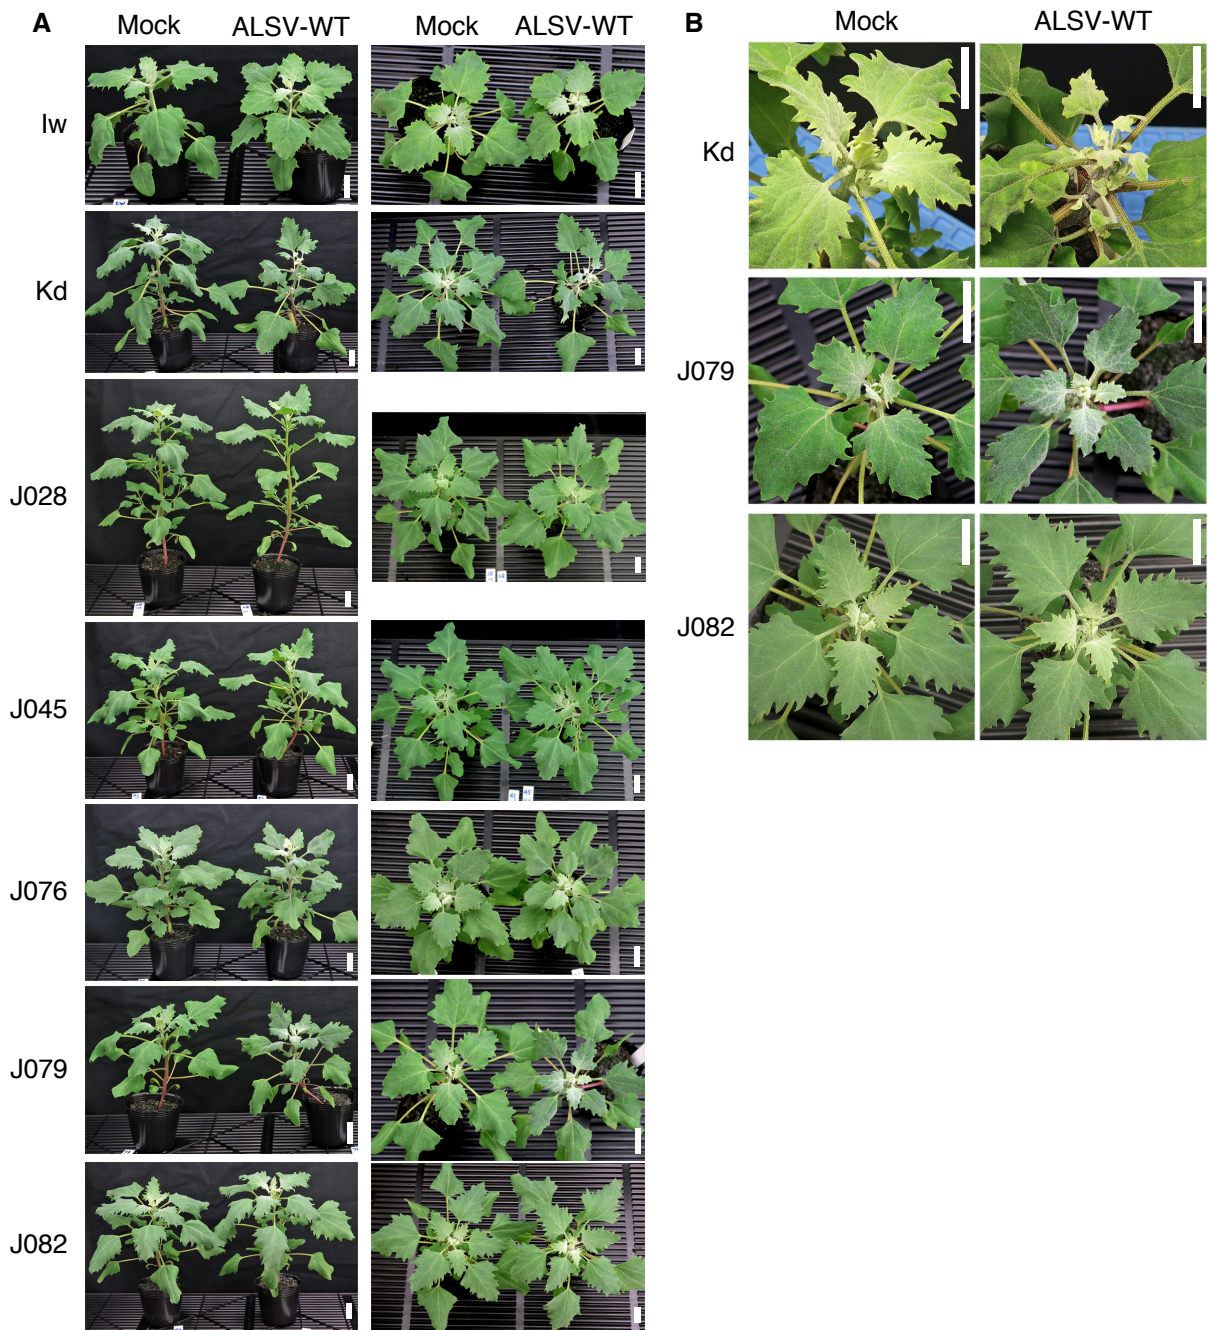

**Figure S2** Three lowland inbred lines of quinoa, J028, J045, and J082, display almost no symptoms and show no negative growth effects following ALSV infection. (A) Side (left panels) and top (right panels) views of representative images of lowland line plants at 16 dpi with mock buffer and ALSV-WT. (B) Representative images of enlarged views of the uninoculated upper leaves of Kd, J079, and J082 inbred line plants at 16 dpi with mock and ALSV-WT. Scale bars represent 2 cm.

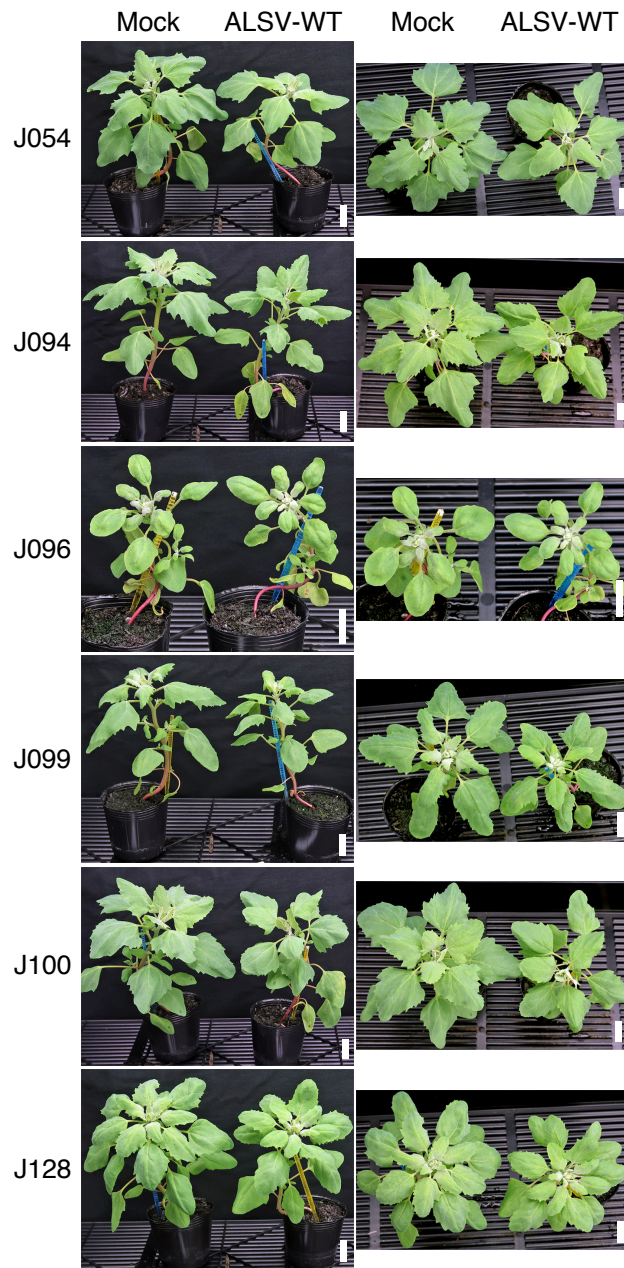

**Figure S3** Southern highland inbred lines of quinoa show mild growth retardation following ALSV infection. Side (left panels) and top (right panels) views of representative images of southern highland line plants at 16 dpi with mock buffer and ALSV-WT. Scale bars represent 2 cm.



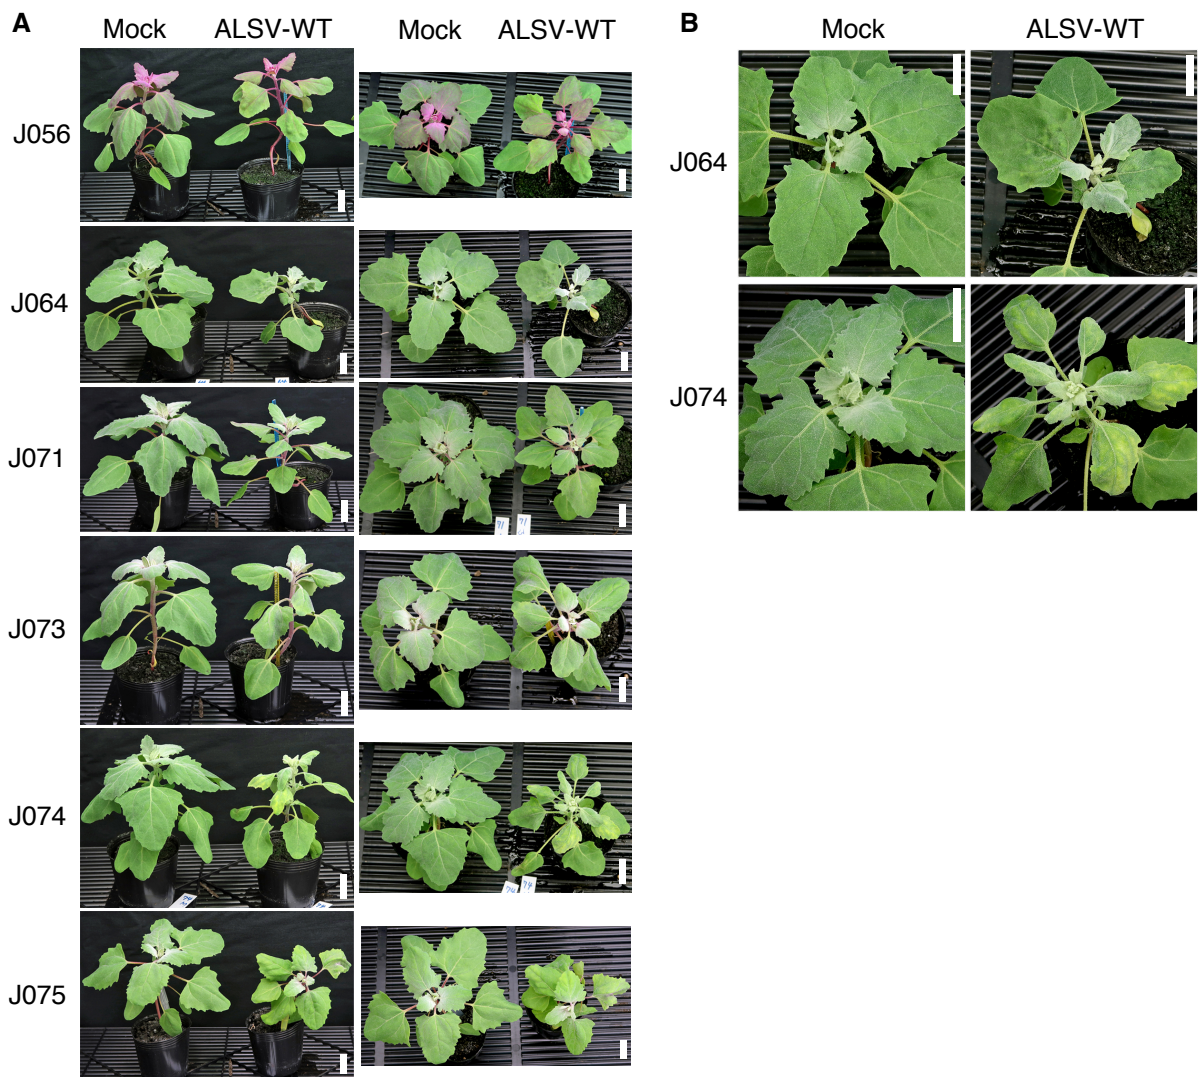

**Figure S4** Some northern highland inbred lines exhibit growth retardation and visible symptoms following ALSV infection. (A) Side (left panels) and top (right panels) views of representative northern highland line plants at 16 dpi with mock buffer and ALSV-WT. ALSV-infected plants showed some growth retardation to varying degrees in the northern highland lines used in this study. (B) Enlarged views of representative uninoculated upper leaves of J064 and J074 inbred line plants at 16 dpi with mock and ALSV-WT. Scale bars represent 2 cm.



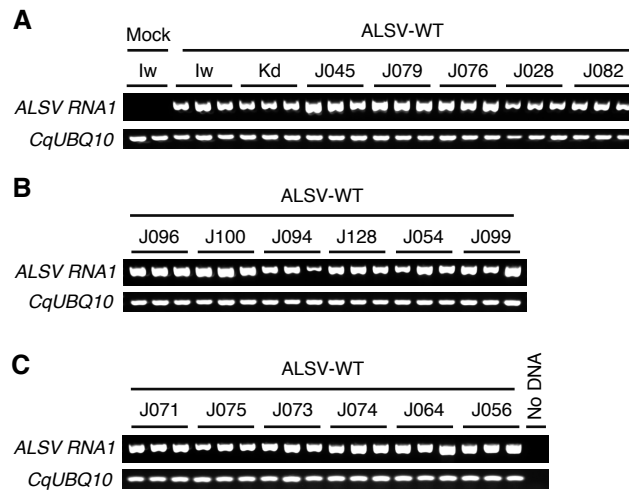

**Figure S5** ALSV can infect plants systemically in a variety of quinoa inbred lines. (A–C) Semi-quantitative RT-PCR of ALSV RNA1 in the uninoculated upper leaves of plants at 16 dpi with mock and ALSV-WT in 19 representative lines, including seven lowland (A), six southern (B), and six northern highland lines (C). *CqUBQ10* was used as an internal control. No DNA indicates the absence of DNA template in PCR as a negative control. Two or three independent plants per inbred line were examined.
